# Supplementary material for: Transcriptomic analyses highlight the likely metabolic consequences of colonization of a cnidarian host by native or non-native Symbiodinium species
Source: PubMed Central journal article supplement (PMC6451341; doi:10.1242/bio.038281), 2019-02-27
Supplement: biolopen-8-038281-s1.pdf [file biolopen-8-038281-s1.pdf]

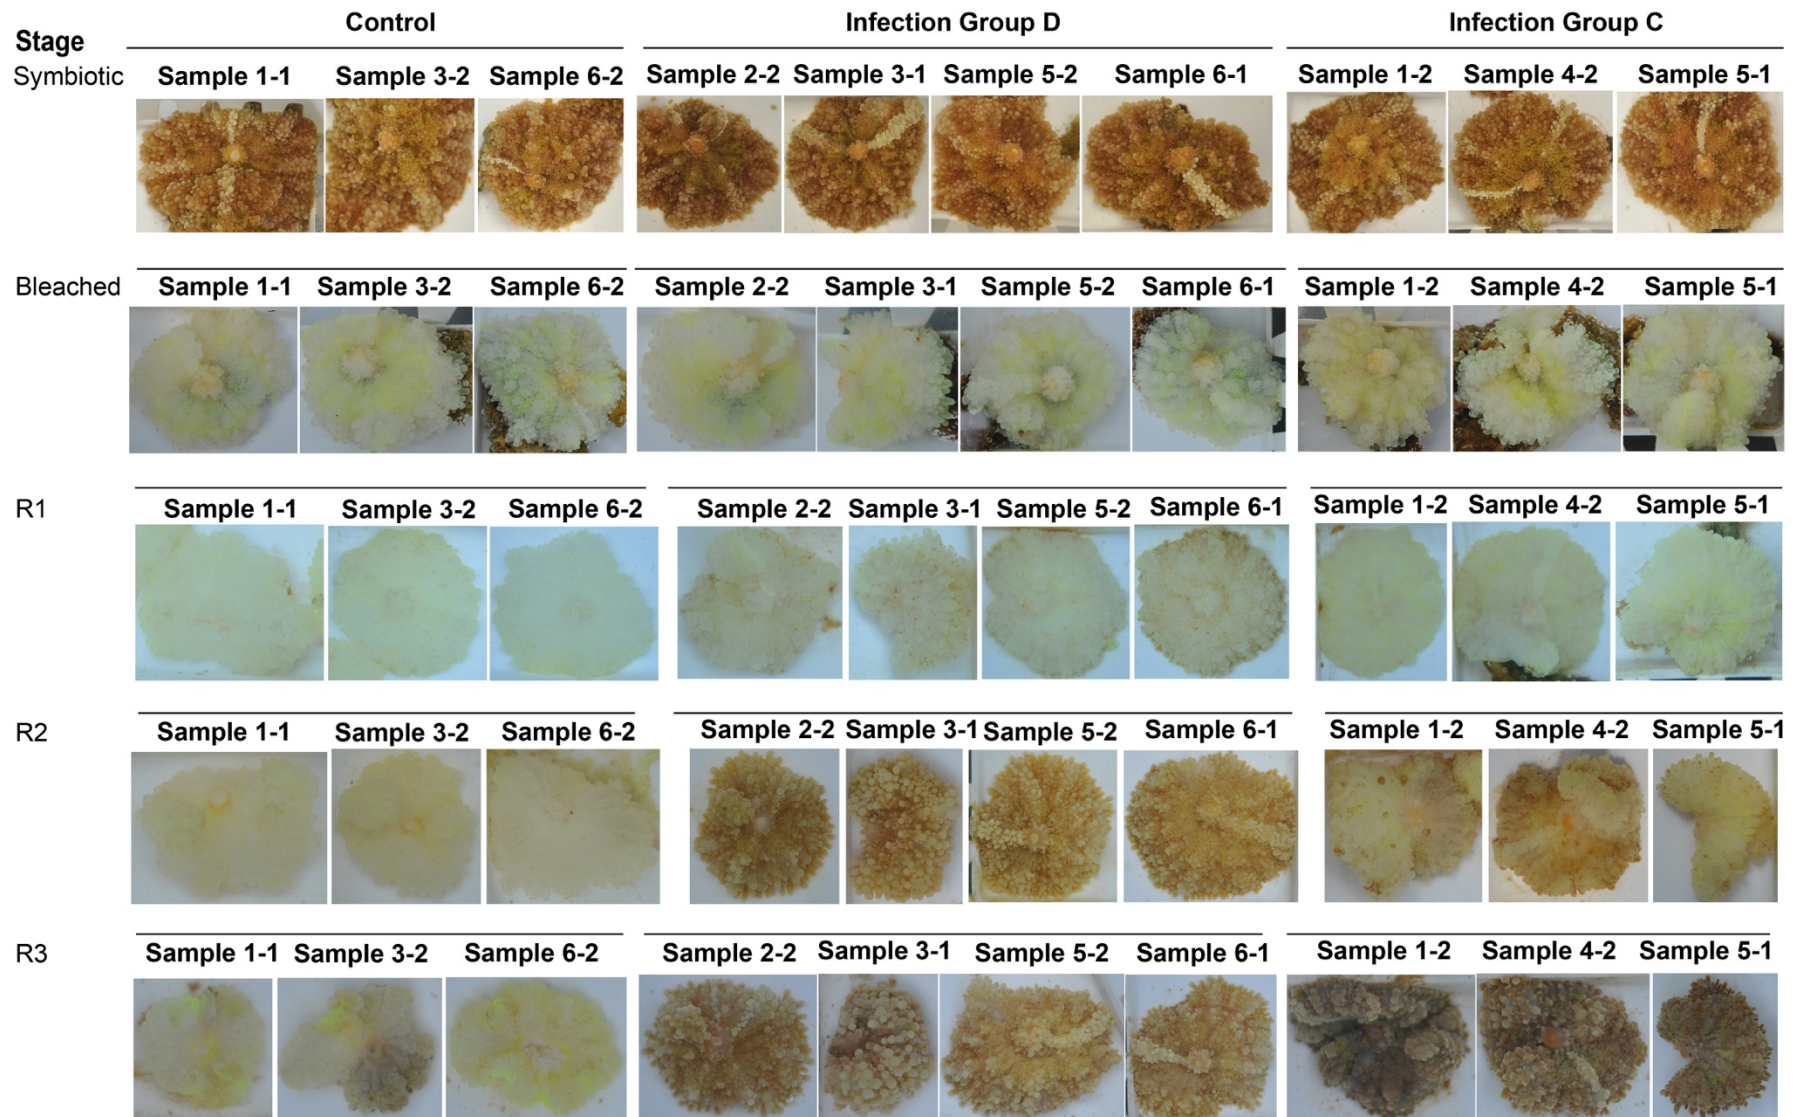

**Figure S1.** Images of samples in each group throughout the experiment.

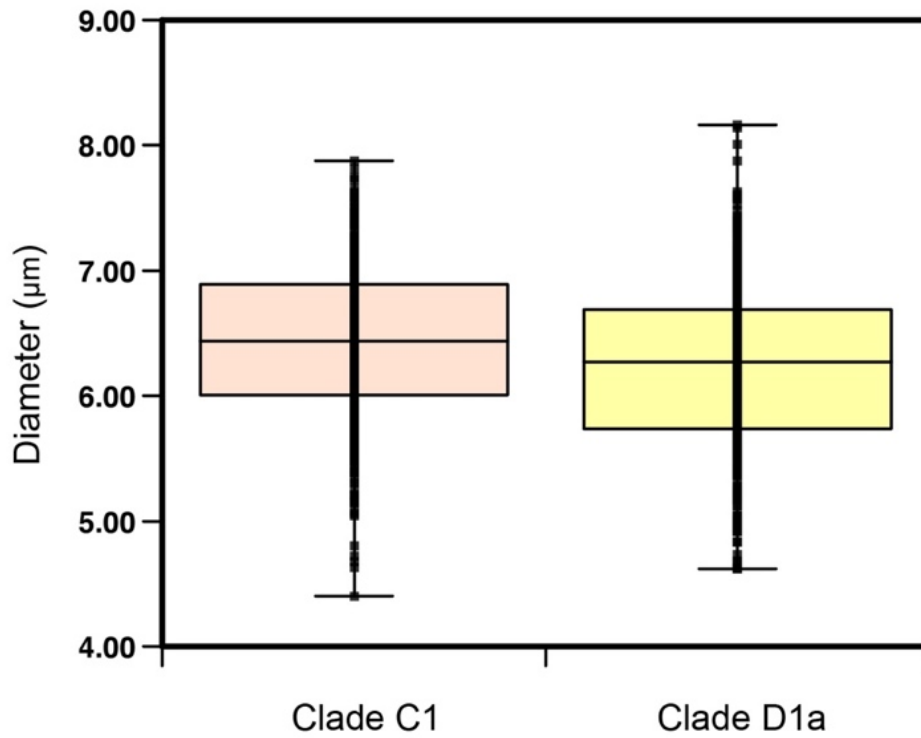

**Figure S2.** Box plot of cell diameters of the two *Symbiodinium* species included in this study. Number of cells measured for *Symbiodinium goreau* and *S. trenchii* were 426 and 418, respectively.

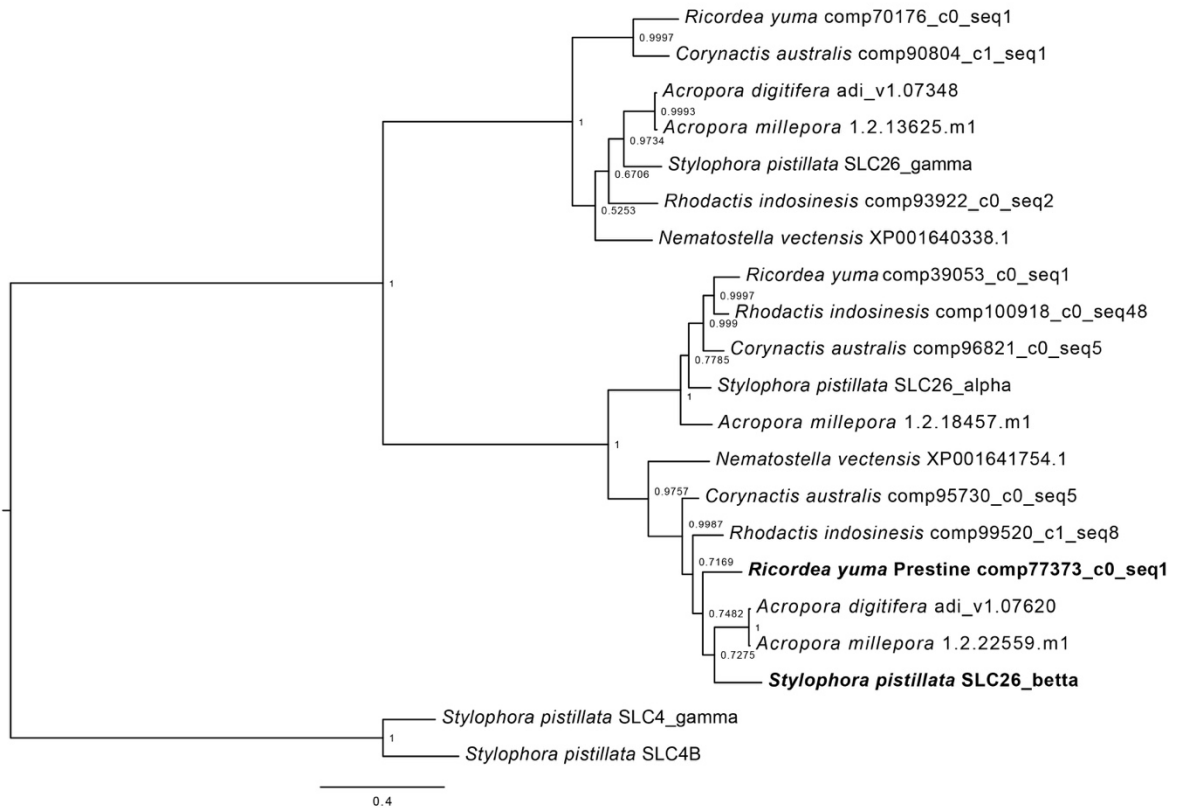

**Figure S3.** Phylogenetic tree of SLC26 sequences inferred by Bayesian analysis with best-fit model of WAG+G for 2 million generations with first 2000 trees as burnin. The *Ricordea* Pristine (SLC26) and *Stylophora* SLC26 $\beta$  sequences are indicated in bold.

**Table S1.** Experimental design for the *Ricordea* reference transcriptome development.

|                   |                 |                  |                         |                              |                  |                              |
|-------------------|-----------------|------------------|-------------------------|------------------------------|------------------|------------------------------|
| Samples treatment |                 |                  |                         |                              |                  |                              |
| Symbiotic         | <b>Sample I</b> | <b>Sample II</b> | <b>Sample III</b>       |                              | <b>Sample V1</b> |                              |
| Darkness bleached |                 |                  | Sample III <sub>d</sub> | <b>Sample IV<sub>d</sub></b> |                  |                              |
| Menthol bleached  | Sample I 1m     |                  |                         |                              | Sample V2m       | <b>Sample VI<sub>m</sub></b> |

Sample relations:

The samples marked in bold present the mother polyps.

For the daughter polyps, Sample I1m was duplicated from Sample I via asexual reproduction budding, Sample III<sub>d</sub> is the same polyp as Sample

III but with darkness treatment after sampling for symbiotic condition, and Sample V2m was duplicated from Sample V1 via cutting.

**Table S2. A.** *Symbiodinium* ITS 2 identification in each sample before and at the final stage of colonization. The annotation of the ITS products after the colonization based on BLASTN against NCBI non-redundant database.

| Sample             | Group C                    |          |          | Group D                    |                            |                            |                           | Group control |          |          |
|--------------------|----------------------------|----------|----------|----------------------------|----------------------------|----------------------------|---------------------------|---------------|----------|----------|
|                    | 1-2                        | 4-2      | 5-1      | 2-2                        | 3-1                        | 5-2                        | 6-1                       | 1-1           | 3-2      | 6-2      |
| Before reinfection | Clade C1                   | Clade C1 | Clade C1 | Clade C1                   | Clade C1                   | Clade C1                   | Clade C1                  | Clade C1      | Clade C1 | Clade C1 |
| After reinfection  | Clade C1                   | Clade C1 | Clade C1 | Clade C1                   | Clade D1a                  | Clade C1                   | Clade C1                  | -             | -        | -        |
| ITS annotation     | <i>Symbiodinium</i> sp. C1 |          |          | <i>Symbiodinium</i> sp. C1 | <i>Symbiodinium</i> sp. D1 | <i>Symbiodinium</i> sp. C1 | <i>Symbiodinium</i> sp. C | NA            | NA       | NA       |
| Accession          | KU842043                   |          |          | KU842043                   | MH211594                   | KU841885                   | MH236766                  |               |          |          |
| Evalue             | 9.00E-125                  |          |          | 4.00E-118                  | 2.00E-101                  | 3.00E-18                   | 2.00E-96                  |               |          |          |

**Table S3.** Common differentially expressed genes in the infection groups.

| Contig            | Gene                                                   | Domain/Family                                                                                                               | TM       | SP  | Blast Hit             | Accession number | Evalue    | Predicted function                     |
|-------------------|--------------------------------------------------------|-----------------------------------------------------------------------------------------------------------------------------|----------|-----|-----------------------|------------------|-----------|----------------------------------------|
| comp77383_c0_seq1 | Krueppel-like factor 11                                | Zinc-finger double domain                                                                                                   | No       | No  | Orbicella faveolata   | XP_020623631.1   | 1.00E-168 | DNA binding                            |
| comp80166_c4_seq5 | Fibrillin-1                                            | C-type lectin-like domain, H-type lectin domain, Kazal type serine protease inhibitors and follistatin-like domains, TLD do | No       | Yes | Exaiptasia pallida    | KXJ08513.1       | 0.00E+00  | Microfibrils formation                 |
| comp80329_c2_seq2 | Williams-Beuren syndrome chromosomal region 27 protein | Methyltransferase domain                                                                                                    | No       | No  | Orbicella faveolata   | XP_020620990.1   | 4.00E-70  | Methyltransferase                      |
| comp73494_c0_seq1 | Short-chain dehydrogenase/reductase family 9C member 7 | Rossmann-fold NAD(P)H/NAD(P)(+) binding (NADB) domain                                                                       | No       | No  | Nematostella vectensi | XP_001626221     | 9.00E-26  | Retinol dehydrogenase activity         |
| comp73218_c0_seq1 | Putative diacylglycerol O-acyltransferase MT1468       | Wax ester synthase-like Acyl-CoA acyltransferase domain                                                                     | Yes      | No  | Acropora digitifera   | XP_015771540.1   | 0.00E+00  | Glycerol metabolic                     |
| comp63787_c0_seq1 | Transmembrane protein-like                             | N/A                                                                                                                         |          |     |                       |                  |           |                                        |
| comp73878_c0_seq1 | Solute carrier family 25 member 36                     | Mitochondrial carrier protein                                                                                               | No       | No  | Stylophora pistillata | XP_022795900.1   | 5.00E-81  | Pyrimidine transport                   |
| comp77373_c0_seq1 | Prestin                                                | Sulp family                                                                                                                 | Yes (12) | No  | Stylophora pistillata | XP_022800348.1   | 0.00E+00  | Bicarbonate transport                  |
| comp66887_c0_seq1 | Epidermal retinol dehydrogenase 2                      | NADB domain                                                                                                                 | No       | No  | Stylophora pistillata | XP_022788125.1   | 2.00E-171 | Oxidoreductase                         |
| comp81225_c0_seq1 | Putative gastrointestinal growth factor                | Trefoil (P-type) domain                                                                                                     | No       | Yes | Orbicella faveolata   | XP_020628961.1   | 2.00E-64  | Unknown                                |
| comp33276_c0_seq2 | Uncharacterized gene                                   | N/A                                                                                                                         |          |     |                       |                  |           |                                        |
| comp80659_c0_seq1 | Hypothetical protein                                   | Thyroid hormone-inducible hepatic protein Spot                                                                              | No       | No  | Orbicella faveolata   | XP_020612969.1   | 2.00E-102 | Unknown                                |
| comp74456_c0_seq6 | Uncharacterized gene                                   | N/A                                                                                                                         |          |     |                       |                  |           |                                        |
| comp71785_c0_seq1 | Battenin                                               | Nucleotide transporters                                                                                                     | Yes (9)  | No  | Orbicella faveolata   | XP_020610528.1   | 7.00E-108 | Nucleotide transport                   |
| comp81878_c0_seq1 | Cation transport regulator-like protein 1              | GGCT-like domain                                                                                                            | No       | No  | Orbicella faveolata   | XP_020632724.1   | 6.00E-110 | Inorganic ion transport and metabolism |
| comp53987_c0_seq1 | Uncharacterized gene                                   | N/A                                                                                                                         |          |     |                       |                  |           |                                        |
| comp76481_c0_seq1 | Protein phosphatase 1 regulatory subunit 3B            | Carbohydrate binding domain                                                                                                 | No       | No  | Orbicella faveolata   | XP_020623779.1   | 3.00E-99  | Glycogen metabolism                    |
| comp80594_c0_seq1 | Lipid storage droplets surface-binding protein 2       | Perilipin family                                                                                                            | No       | No  | Orbicella faveolata   | XP_020621197.1   | 1.00E-157 | Lipid storage                          |
| comp77093_c2_seq3 | Ammonium transporter Rh type C                         | Ammonium Transporter Family                                                                                                 | Yes (12) | Yes | Stylophora pistillata | XP_022795556.1   | 0.00E+00  | Ammonium transporter                   |
| comp82341_c0_seq1 | F-box/LRR-repeat protein 7                             | F-box domain                                                                                                                | No       | No  | Orbicella faveolata   | XP_020608679.1   | 2.00E-153 | Signal transduction regulation         |
| comp92750_c0_seq1 | Protein phosphatase 1 regulatory subunit 3D            | Carbohydrate binding domain                                                                                                 | No       | No  | Orbicella faveolata   | XP_020631339.1   | 1.00E-43  | Protein serine/threonine phosphatase   |
| comp52813_c0_seq2 | Uncharacterized gene                                   | N/A                                                                                                                         |          |     |                       |                  |           |                                        |
